# Supplementary material
Source: ML conference proceedings conference paper supplement (https://proceedings.mlr.press/v51/filan16.html)
Supplement: Supplementary file 1 [file filan16-supp.pdf]

---

# Loss Bounds and Time Complexity for Speed Priors: Supplementary Material

---

**Daniel Filan**

**Jan Leike**

**Marcus Hutter**

College of Engineering and Computer Science, Australian National University

**Similar definitions for  $S_{\text{Fast}}$  and  $S_{Kt}$**

**Proposition 3.**

$$S_{\text{Fast}}(x) \cong \sum_{p \rightarrow x} \frac{2^{-2|p|}}{t(p, x)}$$

*Proof.* First, we note that for each program  $p$  and string  $x$ , if  $p \rightarrow_i x$ , then for all  $j \geq i$ ,  $p \rightarrow_j x$ . Now,

$$\begin{aligned} \sum_{j=i}^{\infty} 2^{-j} \times 2^{-|p|} &= 2 \times 2^{-i} \times 2^{-|p|} \\ \Rightarrow \sum_{i=1}^{\infty} 2^{-i} \sum_{p \rightarrow_i x} 2^{-|p|} &\cong \sum_{i=1}^{\infty} 2^{-i} \sum_{\substack{p \rightarrow_i x \\ p \not\rightarrow_{i-1} x}} 2^{-|p|} \end{aligned} \quad (14)$$

since all of the contributions to  $S_{\text{Fast}}(x)$  from program  $p$  in phases  $j \geq i$  add up to twice the contribution from  $p$  in PHASE  $i$  alone.

Next, suppose  $p \rightarrow_i x$ . Then, by the definition of FAST,

$$\begin{aligned} t(p, x) &\leq 2^{i-|p|} \\ \Leftrightarrow \log t(p, x) &\leq i - |p| \\ \Leftrightarrow |p| + \log t(p, x) &\leq i \end{aligned}$$

Also, if  $p \not\rightarrow_{i-1} x$ , then either  $|p| > i - 1$ , implying  $|p| + \log t(p, x) > i - 1$ , or  $t(p, x) > 2^{i-1-|p|}$ , also implying  $|p| + \log t(p, x) > i - 1$ . Therefore, if  $p \rightarrow_i x$  and  $p \not\rightarrow_{i-1} x$ , then

$$i - 1 < |p| + \log t(p, x) \leq i$$

implying

$$-|p| - \log t(p, x) - 1 < -i \leq -|p| - \log t(p, x) \quad (15)$$

Subtracting  $|p|$  and exponentiating yields

$$\frac{2^{-2|p|-1}}{t(p, x)} \leq 2^{-i-|p|} \leq \frac{2^{-2|p|}}{t(p, x)}$$

giving

$$2^{-i-|p|} \cong \frac{2^{-2|p|}}{t(p, x)}$$

Therefore,

$$\sum_{i=1}^{\infty} 2^{-i} \sum_{\substack{p \rightarrow_i x \\ p \not\rightarrow_{i-1} x}} 2^{-|p|} \cong \sum_{p \rightarrow x} \frac{1}{t(p, x)} 2^{-2|p|} \quad (16)$$

which, together with equation (14), proves the proposition.  $\square$

Note that in (14) equality actually holds up to a factor of 2, and the sides of (16) are within a factor of two of each other, meaning that  $S_{\text{Fast}}(x)$  is actually within a factor of 4 of  $\sum_{p \rightarrow x} 2^{-2|p|}/t(p, x)$ .

**Proposition 4.**

$$S_{Kt}(x) \cong \sum_{i=1}^{\infty} 2^{-i} \sum_{p \rightarrow_i x} 1$$

*Proof.* Using equation (15), we have that if  $p \rightarrow_i x$  and  $p \not\rightarrow_{i-1} x$ , then

$$\frac{2^{-|p|-1}}{t(p, x)} \leq 2^{-i} \leq \frac{2^{-|p|}}{t(p, x)}$$

so

$$2^{-i} \cong \frac{2^{-|p|}}{t(p, x)}$$

Summing over all programs  $p$  such that  $p \rightarrow_i x$  and  $p \not\rightarrow_{i-1} x$ , we have

$$2^{-i} \sum_{\substack{p \rightarrow_i x, \\ p \not\rightarrow_{i-1} x}} 1 \cong \sum_{\substack{p \rightarrow_i x, \\ p \not\rightarrow_{i-1} x}} \frac{2^{-|p|}}{t(p, x)}$$

Then, summing over all phases  $i$ , we have

$$\sum_{i=1}^{\infty} 2^{-i} \sum_{\substack{p \rightarrow_i x, \\ p \not\rightarrow_{i-1} x}} 1 \cong \sum_{p \rightarrow x} \frac{2^{-|p|}}{t(p, x)} \quad (17)$$

Now, as noted in the proof of Proposition 3, if  $q \rightarrow_i x$ , then  $q \rightarrow_j x$  for all  $j \geq i$ . Similarly to the start of that proof, we note that

$$\sum_{i=j}^{\infty} 2^{-i} \times 1 = 2 \times 2^{-j} \times 1$$

The left hand side is the contribution of  $q$  to the sum

$$\sum_{i=1}^{\infty} 2^{-i} \sum_{p \rightarrow_i x} 1$$

and the right hand side is twice the contribution of  $q$  to the sum

$$\sum_{i=1}^{\infty} 2^{-i} \sum_{\substack{p \rightarrow_i x, \\ p \not\rightarrow_{i-1} x}} 1$$

Therefore,

$$\sum_{i=1}^{\infty} 2^{-i} \sum_{p \rightarrow_i x} 1 \cong \sum_{i=1}^{\infty} 2^{-i} \sum_{\substack{p \rightarrow_i x, \\ p \not\rightarrow_{i-1} x}} 1$$

which, together with (17), proves the proposition.  $\square$

Again, the two sides of the ‘equation’ established in this proposition are within a factor of 4 of each other.

### $S_{Kt}$ is a speed prior

**Proposition 6.** *Let  $x_{1:\infty} \in \mathbb{B}^{\infty}$  be such that there exists a program  $p^x \in \mathbb{B}^*$  which outputs  $x_{1:n}$  in  $f(n)$  steps for all  $n \in \mathbb{N}$ . Let  $g(n)$  grow faster than  $f(n)$ , i.e.  $\lim_{n \rightarrow \infty} f(n)/g(n) = 0$ . Then,*

$$\lim_{n \rightarrow \infty} \frac{\sum_{\substack{p \xrightarrow{\geq g(n)} x_{1:n}}} 2^{-|p|}/t(p, x_{1:n})}{\sum_{\substack{p \xrightarrow{\leq f(n)} x_{1:n}}} 2^{-|p|}/t(p, x_{1:n})} = 0$$

where  $p \xrightarrow{\leq t} x$  iff program  $p$  computes string  $x$  in no more than  $t$  steps.

*Proof.*

$$\begin{aligned} & \lim_{n \rightarrow \infty} \frac{\sum_{\substack{p \xrightarrow{\geq g(n)} x_{1:n}}} 2^{-|p|}/t(p, x_{1:n})}{\sum_{\substack{p \xrightarrow{\leq f(n)} x_{1:n}}} 2^{-|p|}/t(p, x_{1:n})} \\ & \leq \lim_{n \rightarrow \infty} \frac{\sum_{\substack{p \xrightarrow{\geq g(n)} x_{1:n}}} 2^{-|p|}/g(n)}{2^{-|p^x|}/f(n)} \end{aligned} \quad (18)$$

$$\leq \lim_{n \rightarrow \infty} \frac{f(n)}{g(n)} \frac{\sum_{p \rightarrow x_{1:n}} 2^{-|p|}}{2^{-|p^x|}} \quad (19)$$

$$\begin{aligned} & \leq \lim_{n \rightarrow \infty} \frac{f(n)}{g(n)} \frac{1}{2^{-|p^x|}} \\ & = 0 \end{aligned} \quad (20)$$

Equation (18) comes from increasing  $1/t(p, x_{1:n})$  to  $1/g(n)$  in the numerator, and decreasing the denominator by throwing out all terms of the sum except that of  $p^x$ , which takes  $f(n)$  time to compute  $x_{1:n}$ . Equation (19) takes  $f(n)/g(n)$  out of the fraction, and increases the numerator by adding contributions from all programs that compute  $x_{1:n}$ . Equation (20) uses the Kraft

inequality to bound  $\sum_{p \rightarrow x_{1:n}} 2^{-|p|}$  from above by 1. Finally, we use the fact that  $\lim_{n \rightarrow \infty} f(n)/g(n) = 0$ .  $\square$

### Time complexity: Upper bounds

**Theorem 14** ( *$S_{Kt}$  computable in doubly-exponential time*). *For any  $\varepsilon > 0$ , there exists an approximation  $S_{Kt}^{\varepsilon}$  of  $S_{Kt}$  such that  $|S_{Kt}^{\varepsilon}/S_{Kt} - 1| \leq \varepsilon$  and  $S_{Kt}^{\varepsilon}$  is computable in time doubly-exponential in  $|x|$ .*

*Proof.* We again use the general strategy of computing  $k$  PHASES of FAST, and adding up all the contributions to  $S_{Kt}(x)$  we find. Once we have done this, the other contributions come from computations with  $Kt$ -cost  $> k$ . Therefore, the programs making these contributions either have a program of length  $> k$ , or take time  $> 2^k$  (or both).

First, we bound the contribution to  $S_{Kt}(x)$  by computations of time  $> 2^k$ :

$$\sum_{\substack{p \xrightarrow{> 2^k} x}} \frac{2^{-|p|}}{t(p, x)} < \frac{1}{2^k} \sum_{p \rightarrow x} 2^{-|p|} \leq \frac{1}{2^k}$$

Next, we bound the contribution by computations with programs of length  $|p| > k$ . We note that since we are dealing with monotone machines, the worst case is that all programs have length  $k+1$ , and the time taken is only  $k+1$  (since, by the definition of monotone machines, we need at least enough time to read the input). Then, the contribution from these programs is  $2^{k+1} \times (1/(k+1)) \times 2^{-k-1} = 1/(k+1)$ , meaning that the total remaining contribution after  $k$  PHASES is no more than  $2^{-k} + 1/(k+1) \leq 2/(k+1)$ .

So, in order for our contributions to add up to  $\geq 1 - \varepsilon$  of the total, it suffices to use  $k$  such that

$$k = \lceil 2(\varepsilon S_{Kt}(x))^{-1} \rceil \quad (21)$$

Now, again since  $\lambda$  is finitely computable in polynomial time, we substitute it into equation (5) to obtain

$$S_{Kt}(x) \leq \frac{1}{|x|^{O(1)} 2^{|x|}} \quad (22)$$

Substituting equation (22) into equation (21), we get

$$k \leq O(|x|^{O(1)} 2^{|x|})/\varepsilon \quad (23)$$

So, substituting equation (23) into equation (10), we finally obtain

$$\begin{aligned} \# \text{ steps} & \leq 2^{O(|x|^{O(1)} 2^{|x|})/\varepsilon} \left( \frac{O(|x|^{O(1)} 2^{|x|})}{\varepsilon} \right) + 2 \\ & \leq 2^{2^{O(|x|)}} \end{aligned}$$

Therefore,  $S_{Kt}^{\varepsilon}$  is computable in doubly-exponential time.  $\square$

## Computability along polynomial time computable sequences

**Theorem 19** ( $S_{Fast}$  computable in polynomial time on polynomial time computable sequence). *If  $x_{1:\infty}$  is computable in polynomial time, then  $S_{Fast}^\varepsilon(x_{1:n}0)$  and  $S_{Fast}^\varepsilon(x_{1:n}1)$  are also computable in polynomial time.*

*Proof.* Suppose some program  $p^x$  prints  $x_{1:\infty}$  in time  $f(n)$ , where  $f$  is a polynomial. Then,

$$S_{Fast}(x_{1:n}) \geq \frac{2^{-2|p^x|}}{f(n)}$$

Substituting this into equation (11), we learn that to compute  $S_{Fast}^\varepsilon(x_{1:n})$ , we need to compute FAST for  $k$  PHASES where

$$k \leq \left\lceil \log(2^{2|p^x|} f(n)/\varepsilon) \right\rceil$$

Substituting this into equation (10) gives

$$\begin{aligned} \# \text{ steps} &\leq 2^{\log(2^{2|p^x|} f(n)/\varepsilon)} (\log(2^{2|p^x|} f(n)/\varepsilon) - 1) + 2 \\ &= O(f(n) \log f(n)) = O(f(n) \log n) \end{aligned}$$

Therefore, we only require a polynomial number of steps of the FAST algorithm to compute  $S_{Fast}^\varepsilon(x_{1:n})$ . To prove that it only takes a polynomial number of steps to compute  $S_{Fast}^\varepsilon(x_{1:n}b)$  for any  $b \in \mathbb{B}$  requires some more careful analysis.

Let  $\langle n \rangle$  be a prefix-free coding of the natural numbers in  $2 \log n$  bits. Then, if  $b \in \mathbb{B}$ , then there is some program prefix  $p^b$  such that  $p^b \langle n \rangle q$  runs program  $q$  until it prints  $n$  symbols on the output tape, after which it stops running  $q$ , prints  $b$ , and then halts. In addition to running  $q$  (possibly slowed down by a constant factor), it must run some sort of timer to count down to  $n$ . This involves reading and writing the integers 1 to  $n$ , which takes  $O(n \log n)$  time. Therefore,  $p^b \langle n \rangle p^x$  prints  $x_{1:n}b$  in time  $O(f(n)) + O(n \log n)$ , so

$$\begin{aligned} S_{Fast}(x_{1:n}b) &\geq \frac{2^{-2|p^b \langle n \rangle p^x|}}{O(f(n)) + O(n \log n)} \\ &= \frac{1}{O(f(n)) + O(n \log n)} \frac{1}{n^4 2^{2|p^b| + 2|p^x|}} \\ &= \frac{1}{g(n)} \end{aligned}$$

for some polynomial  $g$  of degree 4 greater than the degree of  $f$ . Using equations (11) and (10) therefore gives that we only need  $O(g(n) \log g(n)) = O(g(n) \log n)$  timesteps to compute  $S_{Fast}^\varepsilon(x_{1:n}b)$ . Therefore, both  $S_{Fast}^\varepsilon(x_{1:n}0)$  and  $S_{Fast}^\varepsilon(x_{1:n}1)$  are computable in polynomial time.  $\square$

Note that the above proof easily generalises to the case where  $f$  is not a polynomial.

**Theorem 20** ( $S_{Kt}$  computable in exponential time

on polynomial time computable sequence). *If  $x_{1:\infty}$  is computable in polynomial time, then  $S_{Kt}^\varepsilon(x_{1:n}0)$  and  $S_{Kt}^\varepsilon(x_{1:n}1)$  are computable in time  $2^{n^{O(1)}}$ .*

*Proof.* The proof is almost identical to the proof of Theorem 19: supposing that  $p^x$  prints  $x_{1:n}$  in time  $f(n)$  for some polynomial  $f$ , we have

$$S_{Kt}(x_{1:n}) \geq \frac{2^{-|p^x|}}{f(n)}$$

The difference is that we substitute this into equation (21), getting

$$k \leq \left\lfloor 2^{|p^x|+1} f(n)/\varepsilon \right\rfloor$$

and substitution into equation (10) now gives

$$\begin{aligned} \# \text{ steps} &\leq 2^{2^{|p^x|+1} f(n)/\varepsilon} \left( 2^{|p^x|+1} f(n)/\varepsilon - 1 \right) + 2 \\ &= 2^{O(f(n))} \end{aligned}$$

The other difference is that when we bound  $S_{Kt}(x_{1:n}b) \geq 1/g(n)$ , the degree of  $g$  is only 2 greater than that of the degree of  $f$ . Therefore, we can compute  $S_{Kt}^\varepsilon(x_{1:n}0)$  and  $S_{Kt}^\varepsilon(x_{1:n}1)$  in time  $2^{n^{O(1)}}$ .  $\square$
